# Supplementary material for: The seasonal reproduction number of dengue fever: impacts of climate on transmission
Source: PeerJ journal article supplement (doi:10.7717/peerj.1069), 2015-07-09
Supplement: data_dengue.xls [file data_dengue.xls]

## Sheet: Sheet1
The data derived from
	The average number of dengue incidences	Rainfall (mm)	Temperature ( ºC )
Jan	29.8571	7.45714	22.35
Feb	18.8571	2.08571	24.45
Mar	18.4286	16.7571	27.35
Apr	33.5714	84.2429	29.7
May	116.429	209.586	29
June	306	141.686	28.35
July	554.429	139.943	27.85
August	612.571	243.571	27.6
September	345.286	204.286	27.45
October	183.857	139.571	26.8
November	112.571	21.7429	24.65
December	52.5714	3.1	22.15
