# Supplementary material for: The seasonal reproduction number of dengue fever: impacts of climate on transmission
Source: PubMed Central journal article supplement (PMC4512769; doi:10.7717/peerj.1069), 2015-07-09
Supplement: peerj-03-1069-s001.pdf [file peerj-03-1069-s001.pdf]

## APPENDIX

The disease free equilibrium points of the model are as follow

$$S_H = \frac{\lambda_h N_H}{\mu_h}, S_E = \frac{\mu_m K_E (a - (s + \mu_e))}{as}, S_M = \frac{K_E (a - (s + \mu_e))}{a}.$$

The reproduction number  $R_0$  can be obtained using the method introduced by van den Driessche (2002). We write the system of differential equations as  $\psi = f - v$  where

$$\psi = \begin{bmatrix} I_H \\ I_E \\ L_M \\ I_M \end{bmatrix}, f = \begin{bmatrix} \frac{x_1 b b_h I_M S_H}{N_H} \\ a \left(1 - \frac{S_E + I_E}{K_E}\right) \gamma I_M \\ \frac{x_2 b b_m S_M I_H}{N_H} \\ 0 \end{bmatrix}, v = \begin{bmatrix} (\mu_h + r) I_H \\ (\mu_e + s) I_E \\ (\mu_m + c) L_M \\ -c L_M - s I_E + \mu_m I_M \end{bmatrix} \quad (1)$$

The jacobian matrices  $F$  and  $V$ , associated with  $f$  and  $v$ , respectively, at the disease free equilibrium are:

$$F = \begin{bmatrix} 0 & 0 & 0 & x_1 b b_h \\ 0 & 0 & 0 & a \gamma \left(1 - \frac{S_E}{K_E}\right) \\ x_2 b b_m \frac{N_M}{N_H} & 0 & 0 & 0 \\ 0 & 0 & 0 & 0 \end{bmatrix},$$

$$V = \begin{bmatrix} \mu_h + r & 0 & 0 & 0 \\ 0 & \mu_e + s & 0 & 0 \\ 0 & 0 & \mu_m + c & 0 \\ 0 & -s & -c & \mu_m \end{bmatrix}, \quad (2)$$

and the next generation matrix  $G = FV^{-1}$  is:

$$G = \begin{bmatrix} 0 & 0 & \frac{x_2 b b_m c}{(\mu_m + c) \mu_m} & \frac{x_1 b b_h}{\mu_m} \\ 0 & 0 & \frac{a \gamma (K_E - S_E) c}{K_E (\mu_m + c) \mu_m} & \frac{a \gamma (K_E - S_E)}{K_E \mu_m} \\ \frac{\mu_m + c}{\mu_h + r} & 0 & 0 & 0 \\ 0 & 0 & 0 & 0 \end{bmatrix}, \quad (3)$$

$R_0$  is then the spectral radius of the next generation matrix,  $R_0 = \rho(G)$ , the largest eigenvalue of  $G$ .

Thus

$$R_0 = \frac{\alpha}{2} + \sqrt{\frac{\alpha^2}{4} + \beta}, \quad (4)$$

where

$$\alpha = a \left(1 - \frac{N_E}{K_E}\right) \frac{sr}{(\mu_e + s) \mu_m}$$

$$\beta = \frac{x_1 x_2 b^2 b_h b_m N_m c}{\mu_m N_h (\mu_m + e) (\mu_h + r)}.$$

Note that  $\beta$  is the basic reproduction number proposed by MacDonald (1952).

## REFERENCES

- MacDonald, G. (1952). The analysis of equilibrium in Malaria. *Trop. Dis. Bull.*, 49:813–828.
- van den Driessche, P. Watmough, J. (2002). Reproduction numbers and sub-threshold endemic equilibrium for compartmental models of disease transmission. *Math Bios.*, 180:29–48.
